# Supplementary material for: Identification of aberrantly expressed glycans in gastric cancer by integrated lectin microarray and mass spectrometric analyses
Source: PubMed Central journal article supplement (PMC5349988; doi:10.18632/oncotarget.13539), 2016-11-24
Supplement: oncotarget-07-87284-s001.pdf [file oncotarget-07-87284-s001.pdf]

## Identification of aberrantly expressed glycans in gastric cancer by integrated lectin microarray and mass spectrometric analyses

### SUPPLEMENTARY FIGURE AND TABLES

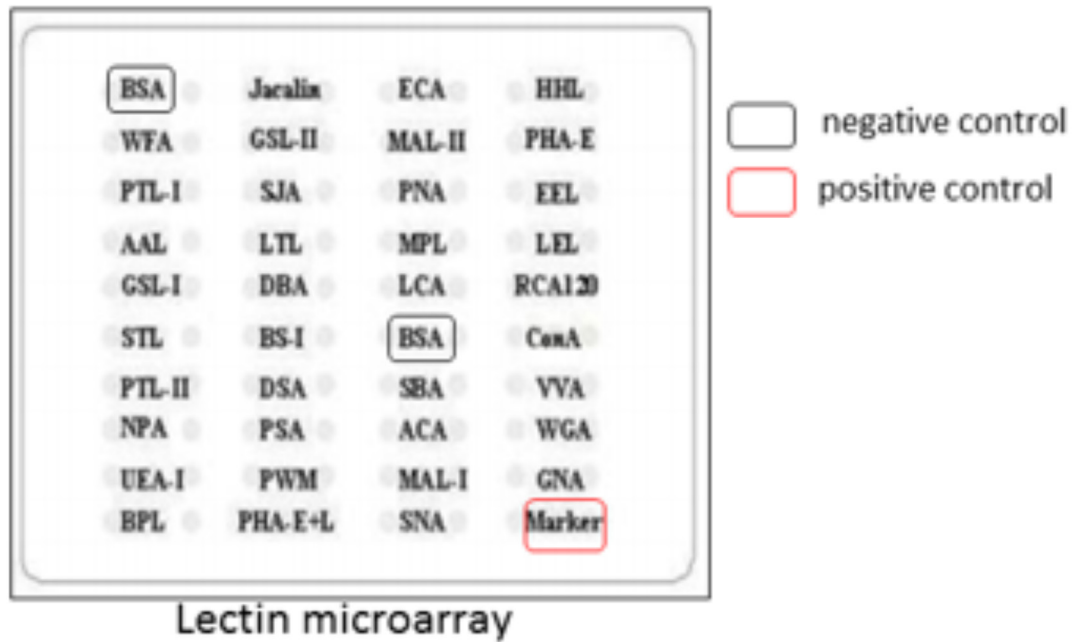

Supplementary Figure S1: lectin microarrays containing 37 lectins (Supplementary Table S2), two negative controls (BSA), and one positive control (Cy3-BSA).

**Supplementary Table S1: Patients' information**

| <b>Characteristics</b> | <b>gastric cancer (n=120)</b> |
|------------------------|-------------------------------|
| Gender                 |                               |
| Male                   | 94                            |
| Female                 | 26                            |
| Age at diagnosis       |                               |
| $\geq 64$              | 61                            |
| $< 64$                 | 59                            |
| Nodal status           |                               |
| Positive               | 88                            |
| Negative               | 32                            |
| T stage                |                               |
| T1-T2                  | 26                            |
| T3-T4                  | 94                            |
| Differentiation        |                               |
| Well and moderate      | 60                            |
| Poor                   | 60                            |
| TNM stage              |                               |
| I-II                   | 59                            |
| III-IV                 | 61                            |

**Supplementary Table S2: Thirty-seven lectins and their relative intensity in gastric cancer and GSE-1 cell lines detected by lectin microarray.**

**See Supplementary File 1**
